# Supplementary material
Source: PubMed Central journal article supplement (PMC1937528)

H3N GST-ARTK<sup>4</sup>QTARK<sup>9</sup>STGGKAPRKQLATKAARK<sup>27</sup>SA  
K4R R  
K9R R  
K27R R

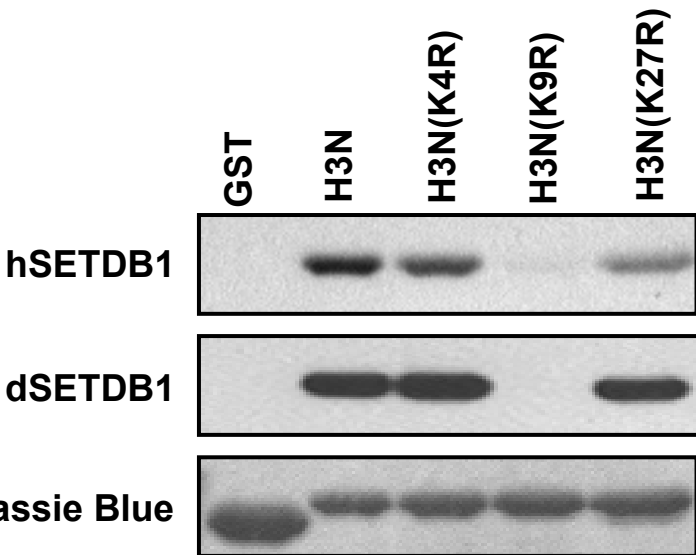

Coomassie Blue

Supplement: pnas_0705534104_1.pdf [file pnas_0705534104_1.pdf]

**A**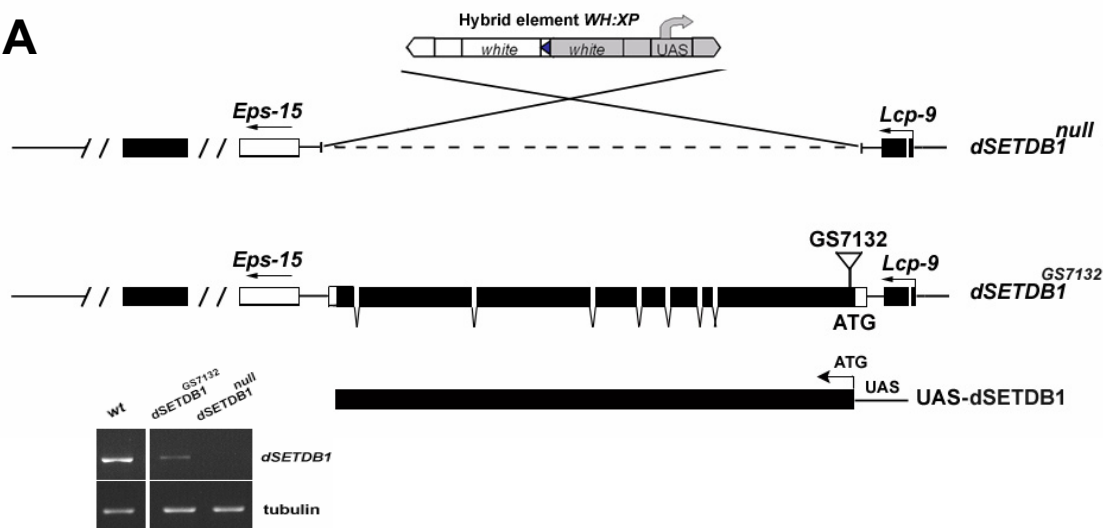**B**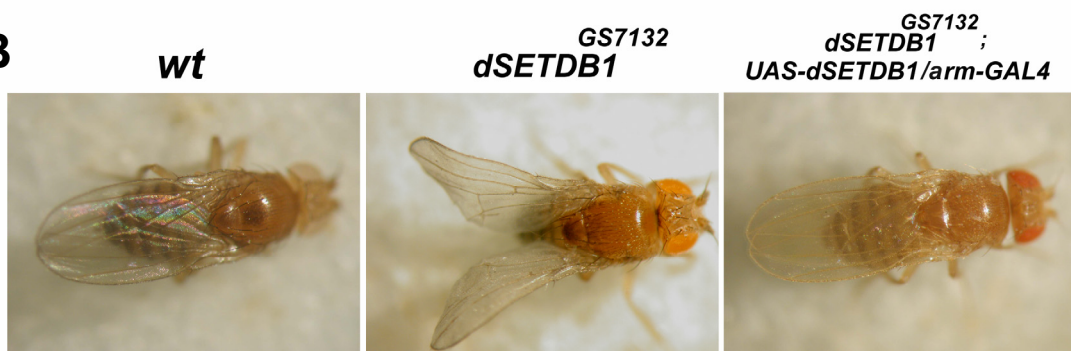**C**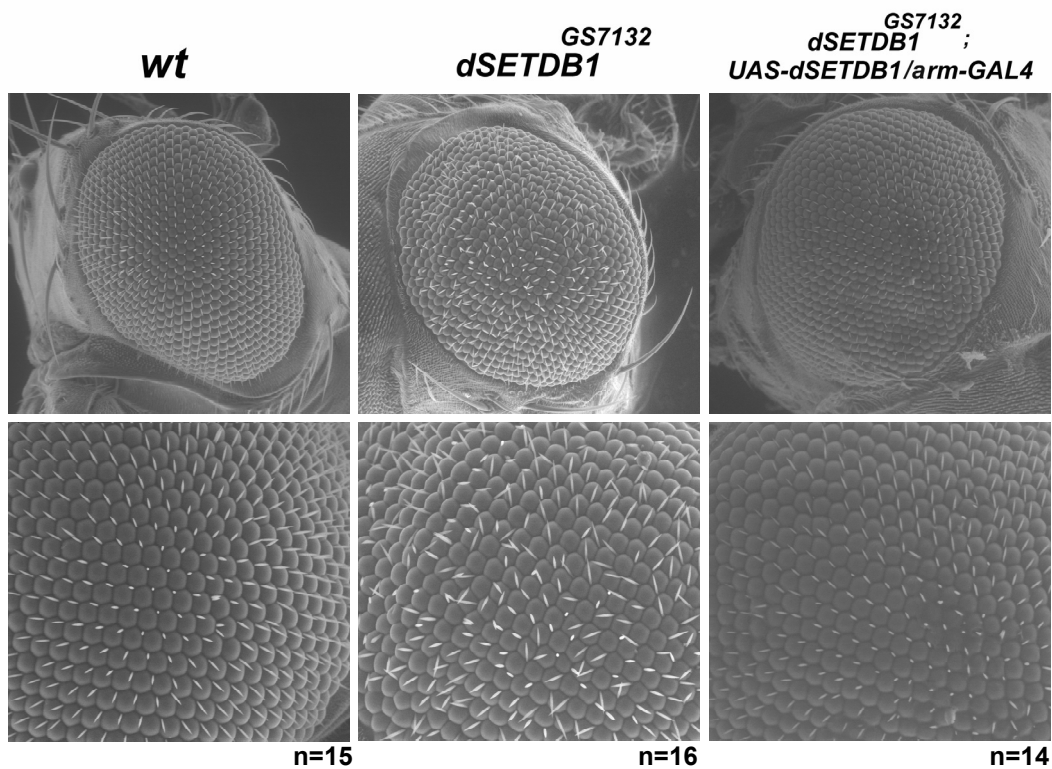

Supplement: pnas_0705534104_2.pdf [file pnas_0705534104_2.pdf]

DNA

H3K9me3

HP1

*wt*

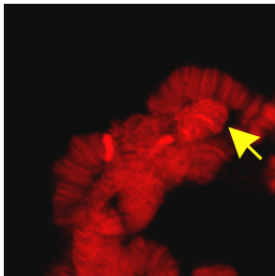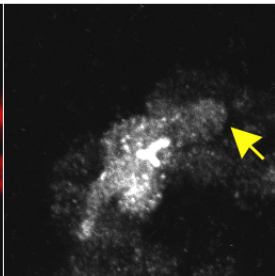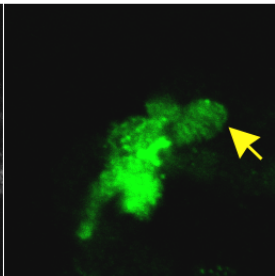

*null*  
*dSETDB1*

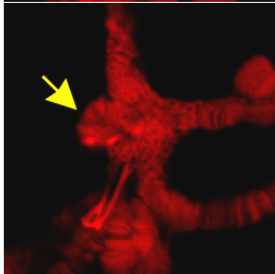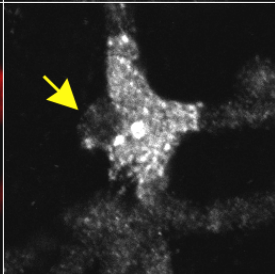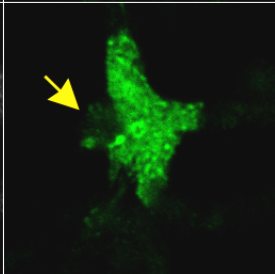

Supplement: pnas_0705534104_3.pdf [file pnas_0705534104_3.pdf]

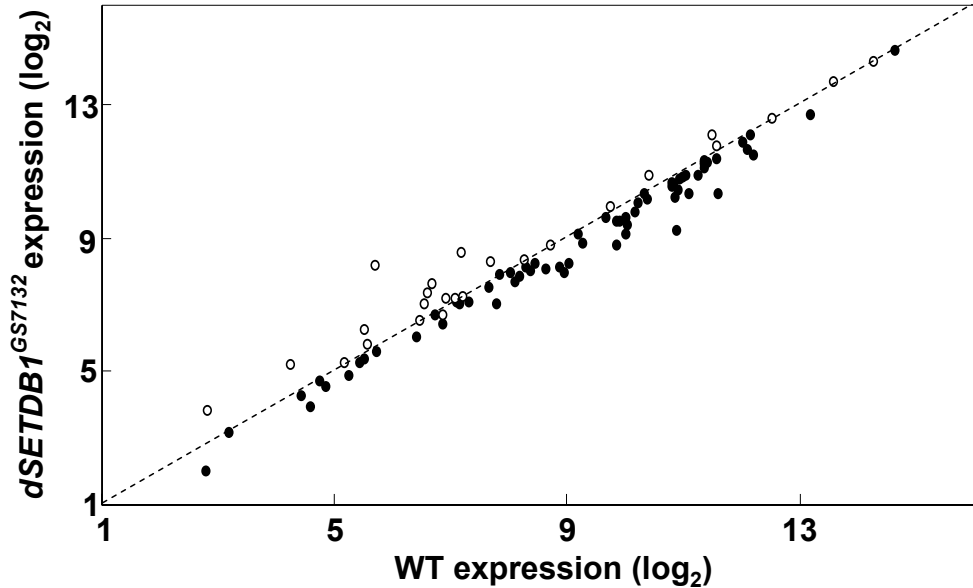

Supplement: pnas_0705534104_4.pdf [file pnas_0705534104_4.pdf]
